# Supplementary material for: Carbapenem Resistance Determinants Acquired through Novel Chromosomal Integrations in Extensively Drug-Resistant Pseudomonas aeruginosa
Source: PubMed Central journal article supplement (PMC8373256; doi:10.1128/aac.00289-21), 2021-06-17
Supplement: aac.00289-21-s0001.pdf [file aac.00289-21-s0001.pdf]

**Table S1** Patient data and source of specimens for the XDR *P. aeruginosa* isolates

| <b>Strain ID</b> | <b>Collection time</b> | <b>Ward ID</b> | <b>Sex</b> | <b>Age group</b> | <b>Source</b>    | <b>Diagnosis</b>        |
|------------------|------------------------|----------------|------------|------------------|------------------|-------------------------|
| 97               | 08/2015                | A              | F          | 10-20            | Urine            | Urinary tract infection |
| 130              | 08/2015                | B              | F          | 20-30            | Wound swab       | Surgical site infection |
| 140              | 09/2015                | B              | M          | 1-10             | Wound swab       | Surgical site infection |
| 142              | 07/2015                | C              | F          | 1-10             | Peritoneal fluid | Peritonitis             |

**Table S2** *P. aeruginosa*<sup>1</sup> included in the phylogenetic and genome analyses

| Strain ID                         | Assembly <sup>2</sup> | MLST <sup>3</sup> | <i>bla</i> <sub>DIM-1</sub> | <i>bla</i> <sub>IMP-1</sub> | Genomic Island (GI) |                  |
|-----------------------------------|-----------------------|-------------------|-----------------------------|-----------------------------|---------------------|------------------|
|                                   |                       |                   |                             |                             | tRNA-Pro(ggg)       | sRNA PrrF1/PrrF2 |
| KCRI-321A* <sup>4</sup>           | GCF_900406895.1       | 244               | +                           |                             |                     |                  |
| IOMTU 133*                        | GCF_001548335.1       | 1047              | +                           |                             |                     |                  |
| NICED-PA-01*                      | GCF_009939155.1       | 1203              | +                           |                             |                     |                  |
| 1334/14                           | GCF_004193735.1       | 234               | +                           |                             |                     |                  |
| 97                                | GCF_002411865.3       | 234               | +                           | +                           | PAGI-97A            | PAGI-97B         |
| 130*                              | GCF_002411845.1       | 234               | +                           | +                           | A-IIIi <sup>5</sup> | GI <sup>6</sup>  |
| 140*                              | GCF_002411815.1       | 234               | +                           | +                           | A-IIIi              | GI               |
| 142*                              | GCF_002411785.1       | 234               | +                           | +                           | A-IIIi              | GI               |
| P1_London_28_IMP_1_04_05*         | GCF_001180345.1       | 111               |                             | +                           |                     |                  |
| P2_London_28_IMP_1_06_05*         | GCF_001180365.1       | 111               |                             | +                           |                     |                  |
| P6_East_of_England_6_IMP_1_03_09* | GCF_001180525.1       | 111               |                             | +                           |                     |                  |
| AR_0241*                          | GCF_003324405.1       | 111               |                             | +                           |                     |                  |
| NCGM257*                          | GCF_001547955.1       | 357               |                             | +                           |                     |                  |
| 113*                              | GCF_004349425.1       | 664               |                             | +                           |                     |                  |
| CCUG 59626*                       | GCF_008180925.1       | 664               |                             | +                           |                     |                  |
| XDR-PA*                           | GCF_900707935.1       | 664               |                             | +                           |                     |                  |
| AR_0103*                          | GCF_001874795.1       | 964               |                             | +                           |                     |                  |
| VNMU144*                          | GCF_009887625.1       | 1047              |                             | +                           |                     |                  |
| VNMU143*                          | GCF_009887715.1       | 1047              |                             | +                           |                     |                  |
| NCGM1179*                         | GCF_000291745.1       | 1285              |                             | +                           |                     |                  |
| 12939*                            | GCF_002753655.1       | 1420              |                             | +                           |                     |                  |
| NCGM2.S1*                         | GCF_000284555.1       | na <sup>7</sup>   |                             | +                           |                     | GI               |
| CCUG 73744*                       | GCF_008244625.1       | na                |                             | +                           |                     |                  |

<sup>1</sup> All circularized genomes with addition of DIM-1 or/and IMP-1-encoding genomes present in PATRIC (assessed April 16<sup>th</sup>, 2020)<sup>2</sup> NCBI assembly accession number (<https://www.ncbi.nlm.nih.gov/assembly>)<sup>3</sup> Multi Locus Sequence Type<sup>4</sup> Genome not completed<sup>5</sup> Phylogroup of *intG* carried by the GI integrated into the locus<sup>6</sup> GI integrated into the sRNA PrrF1/PrrF2 locus of given<sup>7</sup> Not assigned

|                             |                 |     |           |    |
|-----------------------------|-----------------|-----|-----------|----|
| W36662                      | GCF_001516185.2 | 17  |           |    |
| H26027                      | GCF_003798105.1 | 17  |           |    |
| early isolate NN2 (clone C) | GCF_900185255.1 | 17  |           |    |
| FA-HZ1                      | GCF_001750705.1 | 27  | A-Iii     |    |
| HS9                         | GCF_003319235.1 | 27  | A-Iii     |    |
| KRP1                        | GCF_009676885.1 | 27  | A-Iii     |    |
| paerg000                    | GCF_900618245.1 | 27  |           |    |
| W45909                      | GCF_001516205.2 | 27  |           |    |
| AG1                         | GCF_009662315.1 | 111 | A-IIi(c6) | GI |
| FRD1                        | GCF_000829885.1 | 111 | A-IIi(c6) |    |
| Carb01 63                   | GCF_000981825.1 | 111 | A-IIi(c6) |    |
| RIVM-EMC2982                | GCF_002085605.1 | 111 | A-IIi(c6) |    |
| 1                           | GCF_900497025.1 | 111 | A-IIi(c6) |    |
| F30658                      | GCF_001516265.1 | 111 | A-IIii    |    |
| F5677                       | GCF_002946935.1 | 111 |           |    |
| AR445                       | GCF_003073735.1 | 111 |           |    |
| Y82                         | GCF_003369755.1 | 111 |           |    |
| RW109                       | GCF_900243355.1 | 111 |           |    |
| T63266                      | GCF_001516105.1 | 132 |           |    |
| IMP67                       | GCF_008033725.1 | 132 |           |    |
| IMP68                       | GCF_008033745.1 | 132 |           |    |
| IMP66                       | GCF_008033765.1 | 132 |           |    |
| Cu1510                      | GCF_001465155.1 | 137 |           |    |
| LESB58                      | GCF_000026645.1 | 146 | A-Iii     |    |
| LES431                      | GCF_000508765.1 | 146 | A-Iii     |    |
| 12-4-4(59)                  | GCF_001482325.1 | 152 |           |    |
| S86968                      | GCF_001515845.2 | 155 |           |    |
| T38079                      | GCF_001515915.2 | 155 |           |    |
| F9670                       | GCF_001542835.1 | 155 |           |    |
| ATCC 27853                  | GCF_001618925.1 | 155 |           |    |
| Pa1207                      | GCF_002208645.1 | 155 | A-IIi(c3) |    |
| NCTC12903                   | GCF_900636755.1 | 155 |           |    |
| CF39S                       | GCF_011466835.1 | 175 |           |    |
| PcyII-29                    | GCF_902703185.1 | 175 |           |    |
| AR439                       | GCF_003073895.1 | 179 |           |    |

|              |                 |     |    |
|--------------|-----------------|-----|----|
| FDAARGOS_532 | GCF_003812165.1 | 179 |    |
| FDAARGOS_505 | GCF_003813005.1 | 179 |    |
| RP73         | GCF_000414035.1 | 198 |    |
| F63912       | GCF_001594325.2 | 198 |    |
| YB01         | GCF_009867055.1 | 231 |    |
| PA83         | GCF_002215345.1 | 233 | B  |
| AR_0230      | GCF_002968695.1 | 233 | B  |
| AR444        | GCF_003073615.1 | 233 | B  |
| AR_0110      | GCF_003204335.1 | 233 | B  |
| K34-7        | GCF_003206535.1 | 233 | B  |
| AR_0111      | GCF_003571805.1 | 233 | B  |
| W16407       | GCF_001516165.2 | 244 |    |
| FDAARGOS_570 | GCF_003813025.1 | 244 |    |
| Y89          | GCF_003369735.1 | 245 |    |
| Y71          | GCF_003408495.1 | 245 |    |
| E80          | GCF_004291075.1 | 245 |    |
| FDAARGOS_610 | GCF_006364795.1 | 252 |    |
| NCTC13359    | GCF_901472545.1 | 252 |    |
| UCBPP-PA14   | GCF_000014625.1 | 253 |    |
| M1608        | GCF_001516365.2 | 253 |    |
| M37351       | GCF_001516385.1 | 253 |    |
| L10          | GCF_002223805.1 | 253 |    |
| H26023       | GCF_003798145.1 | 253 |    |
| PA14Or_reads | GCF_900095805.1 | 253 |    |
| X78812       | GCF_001542795.2 | 257 |    |
| RD1-3        | GCF_009911735.1 | 257 |    |
| PAER4_119    | GCF_001879525.1 | 260 |    |
| PA59         | GCF_009497675.1 | 260 | GI |
| paerg002     | GCF_900618255.1 | 262 |    |
| paerg004     | GCF_900618265.1 | 262 |    |
| paerg003     | GCF_900618275.1 | 262 |    |
| paerg010     | GCF_900618315.1 | 262 |    |
| paerg011     | GCF_900618325.1 | 262 |    |
| paerg012     | GCF_900618335.1 | 262 |    |
| AR_458       | GCF_003288435.1 | 274 |    |

|             |                 |     |            |
|-------------|-----------------|-----|------------|
| A681        | GCF_007559085.1 | 274 |            |
| PA1088      | GCF_001792835.1 | 277 |            |
| PA8281      | GCF_001792855.1 | 277 |            |
| PA11803     | GCF_001792875.1 | 277 |            |
| PA7790      | GCF_001870265.1 | 277 |            |
| Pa1242      | GCF_002205375.1 | 277 | A-IIi(c4)  |
| WCHPA075019 | GCF_003052005.2 | 277 |            |
| PA298       | GCF_005305005.1 | 277 |            |
| E90         | GCF_008705235.1 | 282 | GI-E90     |
| JB2         | GCF_003060845.1 | 296 |            |
| AR_455      | GCF_003288355.1 | 298 |            |
| PABL048     | GCF_003411785.2 | 298 |            |
| SCV20265    | GCF_000510305.1 | 299 |            |
| B10W        | GCF_001874465.1 | 308 |            |
| PASGNAM699  | GCF_002104595.1 | 308 |            |
| PASGNAM345  | GCF_002104615.1 | 308 |            |
| Pa58        | GCF_002192495.1 | 308 |            |
| AR_0353     | GCF_002968655.1 | 308 |            |
| Pa124       | GCF_002192475.1 | 309 | A-IIi      |
| Pa127       | GCF_002205355.1 | 309 | A-IIi      |
| paerg005    | GCF_900618285.1 | 309 |            |
| paerg009    | GCF_900618305.1 | 309 |            |
| PcyII-40    | GCF_902703195.1 | 309 |            |
| BAMCPA07-48 | GCF_001632245.1 | 313 |            |
| DN1         | GCF_001722005.2 | 316 |            |
| Ocean-1155  | GCF_002237405.1 | 316 |            |
| Ocean-1175  | GCF_002237425.1 | 316 |            |
| C79         | GCF_007833895.1 | 316 |            |
| PB369       | GCF_002812825.1 | 319 |            |
| PB368       | GCF_002812845.1 | 319 |            |
| B41226      | GCF_003950235.1 | 357 |            |
| B17932      | GCF_003952325.1 | 357 |            |
| BA7823      | GCF_003626935.1 | 357 | A-IIi (c5) |
| BA15561     | GCF_003713085.1 | 357 | A-IIi (c7) |
| SP4528      | GCF_003716765.1 | 357 | A-IIi (c7) |

|                      |                 |     |            |
|----------------------|-----------------|-----|------------|
| SP4371               | GCF_003950255.1 | 357 | A-IIi (c7) |
| B14130               | GCF_003952305.1 | 357 | A-IIi (c7) |
| SP4527               | GCF_003991465.1 | 357 | A-IIi (c7) |
| SP2230               | GCF_003952285.1 | 357 |            |
| 519119               | GCF_007559105.1 | 360 |            |
| DK2                  | GCF_000271365.1 | 386 |            |
| SCVFeb               | GCF_001900195.1 | 387 |            |
| SCVJan               | GCF_001900225.1 | 387 |            |
| NHmuc                | GCF_001900265.1 | 387 |            |
| DK1 substr. NH57388A | GCF_900069025.1 | 387 |            |
| H27930               | GCF_001516325.2 | 389 |            |
| PA121617             | GCF_001679685.1 | 389 |            |
| DHS01                | GCF_000496455.2 | 395 | A-IIi(c2)  |
| AR442                | GCF_003073795.1 | 395 | A-IIi(c2)  |
| CCUG 70744           | GCF_003194245.1 | 395 | A-IIi(c2)  |
| 1811-13R031          | GCF_009676765.1 | 395 | A-IIi(c2)  |
| 1811-18R001          | GCF_009676785.1 | 395 | A-IIi(c2)  |
| F22031               | GCF_000816985.1 | 485 |            |
| PAO1                 | GCF_000006765.1 | 549 |            |
| ATCC 15692           | GCF_001729505.1 | 549 |            |
| GIMC5015:PAKB6       | GCF_003957825.1 | 549 |            |
| PAO1161              | GCF_004102665.1 | 549 |            |
| FDAARGOS_767         | GCF_006364735.1 | 549 |            |
| PAO1_Orsay           | GCF_900070375.1 | 549 |            |
| PA_154197            | GCF_002075065.1 | 550 |            |
| AR_0095              | GCF_002997005.1 | 620 |            |
| IMP-13               | GCF_003950015.1 | 621 | A-Iii      |
| PAG5                 | GCF_011106815.1 | 639 |            |
| N15-01092            | GCF_003571505.1 | 654 | A-Ii       |
| PAK                  | GCF_902172305.1 | 693 |            |
| T2101                | GCF_009720425.1 | 708 |            |
| 60503                | GCF_007559065.1 | 773 |            |
| ST773                | GCF_009664165.1 | 773 |            |
| NCTC13715            | GCF_900636975.1 | 773 |            |
| PA1                  | GCF_000496605.2 | 782 |            |

|            |                 |      |
|------------|-----------------|------|
| PA1RG      | GCF_001293085.1 | 782  |
| W60856     | GCF_001516225.2 | 959  |
| PA99       | GCF_009498355.1 | 964  |
| MS14403    | GCF_011045375.1 | 979  |
| AR_0356    | GCF_002968755.1 | 1006 |
| AR441      | GCF_003073695.1 | 1006 |
| B136-33    | GCF_000359505.1 | 1024 |
| H25883     | GCF_003798125.1 | 1076 |
| H47921     | GCF_001516345.1 | 1105 |
| PA-3       | GCF_003691345.1 | 1135 |
| LW         | GCF_004010895.1 | 1182 |
| PA7        | GCF_000017205.1 | 1195 |
| PcyII-10   | GCF_900149285.1 | 1233 |
| PA_150577  | GCF_002442855.1 | 1239 |
| PA34       | GCF_003332705.2 | 1284 |
| F23197     | GCF_001516245.2 | 1295 |
| C7-25      | GCF_902703215.1 | 1710 |
| AR_0360    | GCF_002968515.1 | 1712 |
| NCTC10728  | GCF_900637045.1 | 1750 |
| NCTC9433   | GCF_900478745.1 | 1920 |
| PA_D1      | GCF_001721745.1 | 1971 |
| PA_D2      | GCF_001721765.1 | 1971 |
| PA_D9      | GCF_001721785.1 | 1971 |
| PA_D16     | GCF_001721805.1 | 1971 |
| PA_D22     | GCF_001721825.1 | 1971 |
| PA_D25     | GCF_001721845.1 | 1971 |
| PA_D5      | GCF_001722025.1 | 1971 |
| PA_D21     | GCF_001722045.1 | 1971 |
| PABL017    | GCF_003429205.1 | 2167 |
| AZPAE15042 | GCF_006971785.1 | 2211 |
| N17-1      | GCF_001606045.1 | 2362 |
| SJTD-1     | GCF_000271985.2 | 2619 |
| 8380       | GCF_001548135.1 | 2619 |
| MTB-1      | GCF_000504045.1 | 2689 |
| H5708      | GCF_001516305.2 | 3050 |

|                       |                 |      |           |    |
|-----------------------|-----------------|------|-----------|----|
| VA-134                | GCF_001447845.1 | 3090 |           |    |
| NCTC13618             | GCF_901472595.1 | na   | A-Iii     |    |
| M18                   | GCF_000226155.1 | na   |           |    |
| PPF-1                 | GCF_002287725.2 | na   | A-Iii(c3) |    |
| VRFPA04               | GCF_000473745.2 | na   |           | GI |
| Y31                   | GCF_003369775.1 | na   | B         |    |
| PA1R                  | GCF_000496645.1 | na   |           |    |
| YL84                  | GCF_000524595.1 | na   |           |    |
| PAK                   | GCF_000568855.2 | na   |           |    |
| NCGM 1984             | GCF_000829255.1 | na   |           |    |
| NCGM 1900             | GCF_000829275.1 | na   |           |    |
| DSM 50071             | GCF_001045685.1 | na   |           |    |
| F9676                 | GCF_001077475.1 | na   |           |    |
| NCTC10332             | GCF_001457615.1 | na   |           |    |
| T52373                | GCF_001516005.1 | na   |           |    |
| USDA-ARS-USMARC-41639 | GCF_001518975.1 | na   |           |    |
| TRN6622               | GCF_001921095.1 | na   |           |    |
| E6130952              | GCF_002085755.1 | na   |           |    |
| Pa84                  | GCF_002205335.1 | na   |           |    |
| PB353                 | GCF_002812865.1 | na   |           |    |
| PB354                 | GCF_002812885.1 | na   |           |    |
| PB350                 | GCF_002812905.2 | na   |           |    |
| PB367                 | GCF_002812925.1 | na   |           |    |
| AR_0354               | GCF_002968585.1 | na   |           |    |
| AR_0357               | GCF_002968955.1 | na   |           |    |
| CR1                   | GCF_003025345.2 | na   |           |    |
| MRSN12280             | GCF_003028335.1 | na   |           |    |
| AR_0446               | GCF_003193645.1 | na   |           |    |
| AR_460                | GCF_003288335.1 | na   |           |    |
| PABL012               | GCF_003429185.1 | na   |           |    |
| 24Pae112              | GCF_003433235.1 | na   |           |    |
| 268                   | GCF_003641125.1 | na   |           |    |
| FDAARGOS_571          | GCF_003812885.1 | na   |           |    |
| FDAARGOS_501          | GCF_003812905.1 | na   |           |    |
| AES1M                 | GCF_004355125.1 | na   |           |    |

|             |                 |    |
|-------------|-----------------|----|
| AES1R       | GCF_004355145.1 | na |
| 243931      | GCF_007559125.1 | na |
| CCUG 51971  | GCF_008195485.1 | na |
| HOU1        | GCF_008245185.1 | na |
| CFSAN084950 | GCF_009648875.1 | na |
| T2436       | GCF_009720405.1 | na |
| INP-43      | GCF_009905195.1 | na |
| VIT PC9     | GCF_010694505.1 | na |
| NCTC11445   | GCF_900636735.1 | na |
| NCTC13620   | GCF_901472565.1 | na |

---

**Table S3** Characteristics of integrons present in *P. aeruginosa* strain 97<sup>1</sup>

| <b>ID<sup>2</sup></b> | <b>Chromosomal position</b> | <b>5'-CS<sup>3</sup></b>     | <b>Gene cassette arrays<sup>2</sup></b>                  | <b>3'-CS</b>                              |
|-----------------------|-----------------------------|------------------------------|----------------------------------------------------------|-------------------------------------------|
| In1591                | 2630645- 2637503            | <i>intI1Δ</i>                | <i>qnrVC1, gcu165, aadA6</i>                             | <i>qacEΔ1, sul1, orf5/IRt<sup>4</sup></i> |
| In1592                | 2637504- 2646449            | <i>intI1</i>                 | <i>bla<sub>DIM-1</sub>, gcu185</i>                       | <i>qacEΔ1, tni/IRt</i>                    |
| In1593                | 4853224- 4857408            | <i>IRi<sup>5</sup>/intI1</i> | <i>dfrB5, aadA1</i>                                      | <i>qacEΔ1, sul1, orf5Δ</i>                |
| In1594                | 5155930- 5161775            | <i>intI1</i>                 | <i>dfrB5, arr-2, dfrB5, dfrB5, bla<sub>OXA-129</sub></i> | <i>qacEΔ1, sul1, orf5/IRt</i>             |
| In1595                | 5917750- 5926342            | <i>IRi/intI1</i>             | <i>bla<sub>OXA-10</sub>, aacA4, bla<sub>IMP-1</sub></i>  | <i>qacEΔ1, tni/IRt</i>                    |

<sup>1</sup> GeneBank accession number: NZ\_CP031449.2

<sup>2</sup> As given/identified by the Integral database (<http://integrall.bio.ua.pt/>)

<sup>3</sup> Conserved Sequence

<sup>4</sup> Inverted Repeat t, 25-bp conserved sequence: 5'-TGTCATTTTCAGAAGACGACTGCAC-3'

<sup>5</sup> Inverted Repeat I, 25-bp conserved sequence: 5'-GTGCAGCCGTCTTCTGAAAACGACA-3'
